# Supplementary material for: Advances in Azorella glabra Wedd. Extract Research: In Vitro Antioxidant Activity, Antiproliferative Effects on Acute Myeloid Leukemia Cells and Bioactive Compound Characterization
Source: PubMed Central journal article supplement (PMC7660062; doi:10.3390/molecules25214890), 2020-10-22
Supplement: molecules-25-04890-s001.pdf [file molecules-25-04890-s001.pdf]

**Supplementary Table S1.** Percentage of AML cell viability respect to control used to determine the EC<sub>50</sub> values of AG samples.

| cell line | time | AG sample            | CTRL |     |     | 10 mg/mL |       |       | 25 mg/mL |       |       | 50 mg/mL |       |       |
|-----------|------|----------------------|------|-----|-----|----------|-------|-------|----------|-------|-------|----------|-------|-------|
| KG1       | 24h  | IV                   | 100  | 100 | 100 | 85.91    | 83.95 | 83.60 | 60.06    | 63.90 | 63.92 | 32.42    | 25.53 | 30.60 |
|           |      | VI                   | 100  | 100 | 100 | 85.26    | 79.01 | 80.00 | 66.90    | 64.72 | 59.53 | 20.30    | 24.75 | 22.12 |
|           |      | AG CHCl <sub>3</sub> | 100  | 100 | 100 | 100      | 100   | 96.66 | 81.73    | 84.13 | 83.20 | 37.74    | 43.90 | 40.03 |
|           | 48h  | IV                   | 100  | 100 | 100 | 89.60    | 77.47 | 89.60 | 46.47    | 41.79 | 46.20 | 21.74    | 23.14 | 25.66 |
|           |      | VI                   | 100  | 100 | 100 | 85.26    | 76.01 | 74.00 | 64.10    | 57.72 | 60.00 | 17.33    | 20.12 | 18.10 |
|           |      | AG CHCl <sub>3</sub> | 100  | 100 | 100 | 97.57    | 85.91 | 95.96 | 90.14    | 75.78 | 78.27 | 22.16    | 30.31 | 28.93 |
| MV4-11    | 24h  | IV                   | 100  | 100 | 100 | 54.64    | 48.83 | 51.46 | 49.15    | 48.11 | 50.40 | 39.27    | 34.66 | 28.69 |
|           |      | VI                   | 100  | 100 | 100 | 78.32    | 79.89 | 74.89 | 52.00    | 52.25 | 51.24 | 35.55    | 36.31 | 26.62 |
|           |      | AG CHCl <sub>3</sub> | 100  | 100 | 100 | 100      | 100   | 89.52 | 99.12    | 98.52 | 85.19 | 49.00    | 42.08 | 50.36 |
|           | 48h  | IV                   | 100  | 100 | 100 | 39.00    | 37.65 | 31.44 | 22.51    | 21.56 | 20.31 | 17.63    | 16.61 | 21.00 |
|           |      | VI                   | 100  | 100 | 100 | 38.74    | 53.48 | 38.13 | 22.19    | 23.16 | 23.70 | 19.96    | 18.69 | 13.51 |
|           |      | AG CHCl <sub>3</sub> | 100  | 100 | 100 | 100      | 100   | 100   | 83.12    | 100   | 100   | 36.44    | 42.29 | 37.33 |
